# Supplementary material for: Development of a tissue-specific ribosome profiling approach in Drosophila enables genome-wide evaluation of translational adaptations
Source: PLoS Genet. 2017 Dec 1;13(12):e1007117. doi: 10.1371/journal.pgen.1007117 (PMC5728580; doi:10.1371/journal.pgen.1007117)
Supplement: S4 Table — Flybase ID and gene symbol for each gene is shown, along with the translation efficiency (TE) values in wild type and Tor-OE data sets. The additional columns contain RPKM values for each experimental replicate. (XLSX) [file pgen.1007117.s009.xlsx]

## Sheet: Sheet1
FlyBase ID	Gene Symbol	Wild Type Mean Translaion efficiency	Tor-OE Mean Translation efficiency	Wild Type transcriptional profiling replicate 1 expression value (RPKM)	Wild Type transcriptional profiling replicate 2 expression value (RPKM)	Wild Type transcriptional profiling replicate 3 expression value (RPKM)	Wild Type ribosome profiling replicate 1 expression value (RPKM)	Wild Type ribosome profiling replicate 2 expression value (RPKM)	Wild Type ribosome profiling replicate 3 expression value (RPKM)	Tor-OE transcriptional profiling replicate 1 expression value (RPKM)	Tor-OE transcriptional profiling replicate 2 expression value (RPKM)	Tor-OE transcriptional profiling replicate 3 expression value (RPKM)	Tor-OE ribosome profiling replicate 1 expression value (RPKM)	Tor-OE ribosome profiling replicate 2 expression value (RPKM)	Tor-OE ribosome profiling replicate 3 expression value (RPKM)
FBgn0259214	PMCA	50.0119	39.9929	2.74894	0.840361	0.676429	65.0789	50.5105	44.8173	5.21738	1.51769	1.92686	93.0134	73.7932	103.143
FBgn0051999	CG31999	28.7888	25.0711	8.51618	4.43551	3.46675	113.056	163.208	125.826	13.8107	4.51642	5.66524	144.476	175.81	146.307
FBgn0011206	bol	27.7001	26.1317	0.846137	0.292128	0.324074	12.4734	10.6982	10.2852	0.917724	0.394721	0.483466	13.4162	14.7889	12.7197
FBgn0005666	bt	27.2836	41.5791	16.8472	7.52959	6.42463	362.371	235.707	186.555	15.1302	4.62658	5.86086	422.763	213.076	297.386
FBgn0259216	RhoGAP102A	26.9271	48.9375	1.56235	0.765258	0.933836	29.3776	24.7651	27.6566	1.30421	0.412697	0.691627	31.6969	28.1959	37.4776
FBgn0010379	Akt1	25.3431	17.0426	1.61243	0.884008	1.03417	26.3117	27.8928	29.1206	2.56253	2.08031	1.40642	31.176	32.802	32.6205
FBgn0027865	Tsp96F	24.689	44.6539	2.40942	1.09695	1.22664	44.5173	36.0164	27.9149	4.01399	0.567911	3.1797	60.3639	50.0637	97.8369
FBgn0001624	dlg1	22.0118	21.9382	1.12196	0.36457	0.739542	16.9946	12.0449	13.2005	1.0365	0.59631	0.77666	16.5795	15.7284	18.207
FBgn0025800	Smox	21.2594	9.06582	2.4429	1.18512	0.694171	23.7618	20.9186	25.2681	5.75438	1.6047	1.33205	19.3264	18.6109	16.3058
FBgn0039897	CG1674	19.9069	20.3261	57.1858	30.7797	26.3008	630.054	793.717	602.708	42.4599	25.9851	30.364	556.664	624.966	723.183
FBgn0026869	Thd1	19.7842	23.0708	1.27735	0.426112	0.46356	15.0012	10.0595	11.1258	1.87409	0.383188	0.623409	20.9097	12.5052	15.8473
FBgn0010482	l(2)01289	18.9773	19.8947	19.9767	10.4694	11.1148	231.564	237.486	251.822	20.1009	10.6743	12.4255	228.321	272.832	282.873
FBgn0086361	alph	18.4996	8.60608	1.82217	0.758477	0.588994	15.9625	13.3686	17.1473	5.254	1.5575	1.47226	15.5803	17.4477	17.1525
FBgn0034722	Rtf1	17.9699	9.40539	1.48027	0.653367	0.711637	17.1341	14.5675	14.2604	2.58623	2.60201	1.20052	18.6683	15.6954	17.9667
FBgn0000273	Pka-C1	17.4909	18.8428	6.45462	4.73601	5.21327	88.4233	98.7093	93.4806	7.18101	3.85556	5.14671	86.6323	112.109	79.1931
FBgn0260632	dl	17.4665	16.243	1.97369	0.763337	0.800622	18.4957	16.244	17.4119	4.34407	1.86543	2.20081	36.87	37.744	44.034
FBgn0016977	spen	16.5868	33.6928	0.746431	0.25525	0.249764	14.6373	3.70051	3.90957	1.37305	0.371422	0.500099	33.518	14.9907	18.157
FBgn0035798	frac	16.4711	15.4987	8.05194	1.43243	1.33238	58.676	28.4503	29.6646	13.969	3.53795	7.71332	112.577	68.6057	146.906
FBgn0032683	kon	15.8224	27.4473	0.328762	0.271506	0.136543	3.65299	3.77398	3.06616	0.692588	0.252295	0.124922	6.51787	5.27835	6.49715
FBgn0038294	Mf	15.743	17.1616	110.416	54.6212	51.4911	456.851	1066.14	1213.79	73.619	49.6201	45.1829	370.159	1056.11	1137.39
FBgn0029155	Men-b	15.6262	9.11485	23.5097	15.0592	12.72	153.535	301.748	258.346	18.7851	17.4482	10.6798	105.574	179.519	122.131
FBgn0041094	scyl	15.6016	19.429	3.17531	1.84515	1.88014	47.3726	28.0396	31.3783	3.15591	1.36079	2.42563	45.5964	37.2131	40.0045
FBgn0003891	tud	15.345	7.24551	1.55007	0.438169	0.380767	12.856	7.30519	8.02241	3.39655	0.854319	1.28703	13.624	8.90783	9.39351
FBgn0265191	Glycogenin	14.7631	10.6365	287.459	106.703	82.3784	1440.09	1746.75	1887.23	264.189	118.434	118.018	1308.21	1657.12	1530.18
FBgn0039928	Cals	14.7177	16.549	3.77126	2.87644	3.01694	45.8087	48.7194	45.4622	7.57413	2.82664	5.17481	68.7688	64.6922	91.496
FBgn0263706	CG43658	14.564	8.34461	0.842247	0.917219	0.678347	29.3792	2.11713	4.41049	2.0404	1.76022	1.59896	39.4997	3.337	6.04292
FBgn0025574	Pli	14.4715	11.1151	2.70116	1.00705	1.07249	22.5332	16.7722	19.7528	3.1004	1.55409	1.81204	20.2117	23.4272	21.2943
FBgn0038100	Paip2	14.3278	14.6419	6.17546	3.23255	3.81424	49.1545	50.1317	74.4367	7.01163	2.7795	3.00603	57.3303	52.5548	50.6255
FBgn0261955	kdn	13.6842	7.56182	120.099	28.1669	26.7411	647.751	484.469	493.618	66.5649	36.1974	34.4	323.302	350.581	280.129
FBgn0020497	emb	13.6112	9.73837	2.11387	1.13434	1.36201	22.3221	18.0615	19.5468	5.81065	1.49474	2.59862	28.4616	22.04	24.8739
FBgn0086906	sls	13.3872	22.4941	4.59366	3.01904	2.39429	69.645	30.2865	35.8393	4.18779	2.80609	2.17175	91.1048	40.4133	68.0306
FBgn0032997	CG17486	13.061	11.0924	10.8031	3.5706	3.35308	52.461	57.6411	60.9715	14.024	5.29108	8.02328	76.431	83.8508	96.1166
FBgn0044510	mRpS5	13.0145	14.7117	4.68842	3.4085	3.29646	64.4183	41.0714	43.6911	4.15135	3.39355	3.18826	49.9932	49.7355	55.5921
FBgn0004657	mys	12.8077	8.27601	10.3997	4.18993	3.91593	59.4995	69.888	62.74	19.0638	7.75244	8.2438	77.5479	77.789	88.4238
FBgn0264491	how	12.7003	14.2845	4.01846	3.50494	3.68563	33.1453	64.2837	42.4278	5.42768	3.81213	4.0655	52.7124	80.7199	48.6527
FBgn0031187	CG14619	12.3809	7.45729	2.30987	0.829338	0.828026	15.862	11.9337	13.1542	3.46515	1.44498	1.55871	14.0337	14.5284	12.8866
FBgn0027291	l(1)G0156	12.3724	4.8734	157.406	26.7702	29.4765	579.519	466.656	471.725	59.0571	23.3921	26.8151	152.037	166.299	132.376
FBgn0262509	nrm	12.2564	17.012	5.21037	2.75621	2.93397	53.243	37.4434	38.0398	6.11406	2.99904	4.64049	73.4401	61.2333	86.3435
FBgn0034618	CG9485	12.1603	9.01566	7.81566	4.43849	4.40686	64.3528	62.7965	62.1317	3.31857	5.38569	2.11968	25.708	34.5835	27.2992
FBgn0000046	Act87E	12.0334	8.14283	536.035	266.574	181.87	2225.6	3948.26	3116.75	378.297	202.188	177.519	1647.44	1960.08	1842.52
FBgn0052699	CG32699	12.0215	7.57038	1.32321	0.913675	0.752952	9.63973	11.7367	11.9973	2.23885	1.12626	0.664901	9.4159	8.91011	7.04408
FBgn0024248	chico	12.0017	14.5486	1.96298	1.17227	0.910323	18.6439	11.4004	15.2774	3.71952	1.04208	1.58921	21.9185	24.3784	22.8195
FBgn0265262	Vha68-1	11.8299	12.6268	5.83824	4.19684	3.40182	54.1341	50.6791	48.1083	4.99602	4.73556	3.11718	52.2597	52.0701	51.1985
FBgn0261268	Cul-3	11.8248	7.8784	2.93949	1.33081	1.36561	16.026	19.4956	20.9933	4.81658	2.2635	1.91349	17.3532	21.534	20.1275
FBgn0264492	CkIIalpha	11.7801	10.8798	15.6602	4.98013	6.17366	65.9821	95.4021	73.9011	22.9462	8.57863	12.3922	110.667	138.238	145.017
FBgn0004449	Ten-m	11.6085	13.8214	0.390975	0.239971	0.339739	6.129	2.66259	2.73623	0.959931	0.375444	0.501363	10.6617	6.20095	6.93947
FBgn0032218	CG5381	11.5481	12.7098	5.96893	2.57904	2.83722	41.6066	35.0119	39.9996	6.9948	2.40725	3.60229	41.253	42.4417	52.5964
FBgn0053554	Nipped-A	11.5116	14.4852	0.347348	0.19935	0.210092	3.12949	2.85989	2.34862	0.75621	0.272904	0.386955	6.27671	5.06786	6.41771
FBgn0261999	CG42817	11.3922	10.6676	1.37411	0.260249	0.461933	8.30659	4.27722	5.40295	2.0374	0.621858	0.692796	10.2829	8.35061	9.37161
FBgn0010488	NAT1	11.2318	5.69269	10.8601	10.8407	8.11608	93.725	107.465	122.975	19.1863	15.4395	11.56	87.9003	92.0771	75.5202
FBgn0260049	flr	11.2129	11.67	90.7133	114.635	93.9632	940.108	1333.38	1094.07	59.9222	88.6706	62.4058	690.907	849.191	867.619
FBgn0260794	ctrip	11.0771	11.8282	2.80273	0.89346	0.664663	22.871	9.55496	9.55559	6.47219	2.57706	2.25408	54.1566	25.8537	38.51
FBgn0003371	sgg	11.0164	10.7827	1.61557	1.11092	1.13381	13.4904	13.9806	13.735	2.16377	1.40626	1.33783	15.3202	18.6168	16.0932
FBgn0042185	CG18769	10.8145	10.9783	11.6929	5.29885	4.60805	77.4261	64.4599	62.9321	10.5944	5.45753	5.46458	67.0815	70.6424	74.6407
FBgn0026401	Nipped-B	10.8127	15.3237	1.188	0.758929	0.752776	14.3225	7.15653	8.2447	1.98308	0.666707	1.39749	19.383	14.3035	20.603
FBgn0002645	Map205	10.6747	11.1789	5.37933	2.89886	3.22136	41.2801	40.5717	33.3558	10.0035	3.9962	5.23988	58.6711	52.4003	76.2875
FBgn0039006	Cyp6d4	10.6594	8.36994	2.80547	2.56067	1.6334	23.0834	32.0558	18.3456	5.66626	3.26647	4.02371	30.3241	31.3402	40.8953
FBgn0033919	CG8547	10.6218	5.97581	46.7919	19.8413	18.6221	200.928	265.813	263.957	62.134	30.2629	31.7952	178.993	232.841	233.782
FBgn0011747	Ank	10.6209	7.68587	5.62762	3.31872	3.1694	37.878	41.2143	40.2937	10.5769	4.14218	4.12566	39.2607	37.4251	42.5378
FBgn0261983	l(2)gd1	10.6133	6.1165	3.93154	1.46193	1.1677	17.3178	16.8741	18.558	4.56512	2.95956	2.16208	14.6596	17.246	20.1312
FBgn0051675	CG31675	10.5838	9.166	7.31156	3.90441	3.40735	27.4079	57.0997	45.585	4.75093	3.62813	4.49112	24.5429	46.9189	42.2171
FBgn0264607	CaMKII	10.5733	10.9801	14.1087	7.1504	6.2879	80.147	81.752	91.8414	12.8522	7.50912	6.76018	86.1997	94.4733	92.291
FBgn0264953	Piezo	10.4939	11.3469	1.45493	0.810455	0.665321	12.371	8.51153	8.30099	3.26744	0.941385	1.19194	19.2984	12.4034	17.8299
FBgn0036814	CG14073	10.3978	15.706	0.527023	0.422294	0.315155	4.65292	4.05548	4.02173	2.10212	0.535108	0.59615	14.8239	9.13005	13.7139
FBgn0023215	Mnt	10.3845	13.7979	1.10847	0.996231	0.830228	7.22249	10.3403	11.8376	0.961802	0.508027	0.790575	8.13875	10.3878	9.86987
FBgn0052016	CG32016	10.3549	9.63008	1.52574	1.3393	1.09856	10.7281	14.7945	14.2669	2.67746	1.1314	1.46053	13.4482	14.9759	15.5267
FBgn0015024	CkIalpha	10.3141	9.66668	11.0388	7.84005	9.10217	93.7804	90.9212	98.7568	13.3155	7.51111	9.52863	86.6976	94.2318	94.7465
FBgn0058298	CG40298	10.2619	13.5127	7.03058	1.93539	1.88939	47.5508	24.1881	21.7745	8.45532	3.46842	5.40653	75.196	53.5773	87.5726
FBgn0040297	Nhe2	10.2249	10.2123	0.426478	0.319724	0.216546	2.93468	3.46191	2.80768	0.791904	0.301568	0.414777	4.2462	4.28782	4.58594
FBgn0261836	Msp-300	10.1962	14.1608	3.02825	0.972053	0.764606	41.1527	6.39216	7.96956	5.29823	1.58521	1.72849	66.712	18.2116	31.8085
FBgn0036030	CG6767	10.1047	6.77267	3.18922	1.01516	1.37956	20.0423	14.2849	13.7378	5.19031	1.45289	2.62734	22.3913	13.8317	17.0351
FBgn0036556	CG5830	10.0561	13.8201	3.7591	2.11101	2.13063	20.9751	26.207	25.9383	3.82302	1.23633	1.93851	23.4543	29.1023	22.8472
FBgn0039008	CG6972	9.9946	12.2316	22.1899	6.30854	5.54783	148.705	63.2351	73.5564	18.2113	16.3303	18.7727	200.542	148.407	311.531
FBgn0034903	CG9850	9.96976	4.57784	0.679225	0.73348	0.58836	12.4698	4.08219	3.52124	2.60556	1.26392	1.41853	9.60123	6.92212	6.48535
FBgn0043884	mask	9.96742	12.975	0.92931	0.542343	0.267905	10.8758	2.90469	3.44078	1.98924	0.774289	0.640655	20.0597	8.47897	11.4615
FBgn0028544	CG16884	9.83379	14.8401	16.7032	12.1917	5.36293	110.816	80.1834	87.3628	16.4126	15.8325	7.42127	233.718	155.978	151.605
FBgn0024921	Trn	9.81953	9.63812	2.09109	1.39149	1.49616	14.8514	16.1629	16.0699	2.21259	1.75838	2.08428	19.1036	18.309	20.5673
FBgn0014007	Ptp69D	9.81251	9.53929	0.514233	0.405803	0.565939	5.53194	4.53607	4.24561	1.27483	0.750329	0.700174	8.92799	6.42844	9.13524
FBgn0034071	CG8405	9.78122	5.50259	1.247	0.571389	0.718389	7.99067	7.22035	7.39887	3.16224	1.75406	1.52576	9.62068	9.93102	11.9066
FBgn0039257	tnc	9.75973	6.64149	0.399709	0.157714	0.0827084	3.52262	1.03403	1.15046	0.693643	0.228395	0.212041	3.10289	1.70489	1.69346
FBgn0250819	CG33521	9.73529	14.7035	18.0968	15.2508	11.8207	105.208	166.733	147.281	9.79647	6.69292	7.83974	80.5489	141.418	115.705
FBgn0264894	CG44085	9.65004	9.50933	6.78934	1.24869	1.38524	23.7451	15.204	18.3914	13.4487	2.58762	2.89175	35.6865	32.174	38.867
FBgn0014141	cher	9.59514	9.59851	70.2685	67.2889	58.3852	601.156	629.92	634.58	36.5965	55.4933	30.0228	318.376	471.211	348.403
FBgn0032242	CG5355	9.55962	8.39427	24.7415	19.1922	17.7241	178.179	212.817	184.127	33.4624	28.9103	23.1309	240.499	223.877	237.134
FBgn0261403	sxc	9.5314	9.40893	7.05352	2.85099	3.63265	54.9917	30.4091	36.8048	11.7687	5.43368	5.32067	66.9667	56.0026	65.0719
FBgn0030724	Nipsnap	9.47484	7.8984	152.81	63.8786	51.4209	713.201	642.056	704.779	113.649	52.7324	61.0292	510.306	484.094	611.806
FBgn0000259	CkIIbeta	9.33609	8.25385	3.56027	2.1006	2.17884	26.6114	21.547	22.3903	5.23141	2.37896	3.05484	27.3045	24.9536	27.6551
FBgn0268063	ltl	9.33508	11.4473	0.924175	0.729305	0.809057	10.839	5.31878	7.26856	2.48586	1.77896	2.57062	24.0679	20.7514	33.4058
FBgn0030276	Dlic	9.28787	6.58811	2.48035	1.68665	2.46706	17.6775	19.3639	22.8348	6.51142	3.10972	2.24805	22.4945	20.398	21.9191
FBgn0036101	NijA	9.26545	8.83222	22.4134	21.642	20.3061	138.422	256.07	198.764	31.0782	21.8067	24.6799	189.778	229.466	243.528
FBgn0266719	CG34349	9.24743	8.89005	5.25337	2.29284	1.71113	22.2147	21.7783	23.982	5.97412	2.5249	2.32912	21.4319	28.3594	27.602
FBgn0024734	PRL-1	9.23082	8.96921	7.1122	8.53737	6.98045	59.1324	76.2248	72.9447	9.63045	5.94208	7.56005	60.835	72.2521	63.741
FBgn0001123	G-salpha60A	9.11899	5.72459	26.0806	8.55534	8.70298	115.35	98.8433	99.0463	25.4517	10.2053	12.215	73.9997	78.3786	80.4495
FBgn0028690	Rpn5	9.06182	7.30378	35.1566	51.8019	34.2347	227.099	442.063	417.393	44.9758	53.2258	32.5051	262.371	364.047	300.284
FBgn0000667	Actn	9.03448	7.55847	232.315	87.849	113.346	1034.84	1043.77	1220.46	198.197	133.774	150.724	907.085	1160.04	1420.89
FBgn0030366	Usp7	8.9801	5.53304	2.91333	1.11414	1.49495	12.744	14.4652	14.3256	5.76349	2.50903	2.39313	17.1989	17.3991	15.9871
FBgn0005536	Mbs	8.93091	8.6967	2.04506	1.32566	1.06567	11.3793	11.4757	13.3974	3.72638	1.41548	1.63852	13.7848	17.3881	16.56
FBgn0263006	Ca-P60A	8.89417	7.04675	368.002	119.267	113.639	1551.79	1316.53	1298.58	197.463	129.991	105.72	890.19	1004.43	941.459
FBgn0028734	Fmr1	8.87359	5.40241	2.16651	1.05689	1.48973	13.7745	12.5818	12.4517	2.93939	2.50685	2.05343	12.4218	14.052	13.0923
FBgn0028953	CG14478	8.862	5.75036	1.98968	1.63502	0.915546	12.2973	12.1122	11.8998	4.72553	2.40302	1.89991	15.6612	16.7529	13.2334
