# Supplementary material for: Development of a tissue-specific ribosome profiling approach in Drosophila enables genome-wide evaluation of translational adaptations
Source: PLoS Genet. 2017 Dec 1;13(12):e1007117. doi: 10.1371/journal.pgen.1007117 (PMC5728580; doi:10.1371/journal.pgen.1007117)
Supplement: S5 Table — Fold changes and p-values are presented for genes with significant adaptations in transcription or translation efficiency in GluRIIA versus wild type; 1.5 fold is used as a threshold. Transcriptional expression value and translation efficiency for each experimental replicate as well as the genomic location of the genes are also indicated. (XLSX) [file pgen.1007117.s010.xlsx]

## Sheet: Sheet1
FlyBase ID	Gene Symbol	ribosome profiling RPKM Tor-OE vs wild type fold change	ribosome profiling Tor-OE vs wild type p-value (Baggerley's test)	transcriptional profiling RPKM Tor-OE vs wild type fold change	transcriptional profiling Tor-OE vs wild type p-value (Baggerley's test)	ribosome profiling Tor-OE vs wild type P value (DESeq2 adjusted p-value)	transcriptional profiling Tor-OE vs wild type P value (DESeq2 adjusted p-value)
FBgn0021796	Tor	868.003	5.21578e-07	64.7311	0.00167003	4.92708e-189	9.82281e-57
FBgn0001225	Hsp26	41.4346	0.0364489	7.3145	0.00935635	5.16841e-18	0.00014319
FBgn0053494	CG33494	16.2988	0.00691527	5.39406	0.00458645	1.17457e-11	4.56791e-05
FBgn0010039	GstD3	7.89979	0.000158821	3.56004	0.000365697	1.32385e-06	0.0161141
FBgn0029766	CG15784	5.72741	5.0377e-06	3.24022	2.22045e-15	0.000180303	0.00200455
FBgn0002868	MtnA	5.23505	0	3.05924	0.00113486	2.14609e-10	0.0561702
FBgn0032026	CG7627	5.23306	0.000968904	3.04578	0.0433413	0.00123799	0.117314
FBgn0016078	wun	3.20932	0.00292426	3.54758	4.77708e-05	0.00069957	5.42319e-05
FBgn0032731	CG10641	2.58957	0.0162162	3.91562	0.0221212	0.0837268	0.00430819
FBgn0051547	CG31547	2.08782	0.21996	3.72358	0.00144534	0.495948	0.00358987
FBgn0001230	Hsp68	7.10211	0.0654968	3.68608	0.0130739	0.000910379	0.0270705
FBgn0045063	fdl	1.93968	0.0490307	3.24384	0.0240234	0.482517	0.0336854
FBgn0001224	Hsp23	22.3531	0.026291	2.40207	0.0523253	1.48857e-12	0.939135
FBgn0036806	Cyp12c1	6.64305	2.03373e-10	2.57693	0.0271701	5.42742e-06	0.265973
FBgn0037503	CG14598	6.03296	0.0227909	3.98444	0.163682	7.80393e-05	0.218498
FBgn0033635	CG7777	6.02246	0	1.61996	0.0172021	1.20709e-08	0.973642
FBgn0000551	Edg78E	6.01452	0.0072756	2.11395	0.212734	0.000124459	0.746289
FBgn0034724	babos	5.2053	0.00382522	1.97656	0.0818568	0.00540405	0.696189
FBgn0001226	Hsp27	5.18244	0.010987	1.90807	0.0599523	0.00665734	0.943087
FBgn0033367	proPO45	4.90545	0.00190099	2.17374	0.0259104	6.88364e-05	0.641126
FBgn0036772	CG5290	4.90395	0.00179747	2.19957	0.207935	0.000202845	0.484692
FBgn0040941	CG15308	4.32526	1.62972e-10	1.66328	0.0299481	0.000224205	0.971211
FBgn0040813	Nplp2	4.29408	0.00162048	1.89039	0.0777225	0.00600537	0.789468
FBgn0035679	CG10467	4.28953	1.86849e-05	2.52985	0.00688384	6.00528e-05	0.339313
FBgn0040099	lectin-28C	4.28501	2.69897e-09	1.73689	1.54052e-06	3.73587e-06	0.897952
FBgn0001233	Hsp83	4.19948	4.36754e-05	2.57155	0.00420536	0.000196639	0.0383928
FBgn0036007	path	4.12056	1.55352e-07	2.23244	0.174638	1.92137e-05	0.702352
FBgn0038455	CG14907	4.06408	0.00166245	2.62756	0.0495789	0.000500506	0.122862
FBgn0283437	proPO-A1	4.03708	0.002654	2.82752	0.0194888	0.00328741	0.375469
FBgn0019938	RpI1	4.02023	0.022295	1.62948	0.412583	0.00726386	0.941413
FBgn0034641	mahj	3.91091	0.0109575	2.19516	0.174902	0.0085081	0.568176
FBgn0001257	ImpL2	3.75899	0	2.34804	0.0322633	6.89683e-05	0.15198
FBgn0027611	LM408	3.74205	3.16403e-05	2.65573	7.16421e-06	6.88364e-05	0.0132918
FBgn0031873	Gas41	3.73697	0.000189288	1.62962	0.17711	0.0124134	0.941422
FBgn0038020	GstD9	3.70524	0.000261118	1.69286	0.0317893	0.000403441	0.843816
FBgn0037228	CG1092	3.61987	1.27245e-05	1.9111	0.000281534	4.24752e-05	0.631204
FBgn0002534	Lcp3	3.60278	0.000945945	1.53897	0.000785505	0.000334592	0.936887
FBgn0002526	LanA	3.59402	0.00196495	1.99001	0.0241229	0.00166686	0.178684
FBgn0085261	CG34232	3.59281	0.000414701	2.42561	1.48937e-10	0.00568427	0.0345589
FBgn0001114	Glt	3.57552	0.00166004	2.38203	0.148756	8.474e-05	0.371547
FBgn0029838	CG4666	3.56693	0.00383935	1.2829	0.00573482	0.000858304	0.979697
FBgn0030504	CG2691	3.54081	0.0257045	1.68957	0.269177	0.00891505	0.920804
FBgn0005655	mus209	3.54077	0.000576301	1.43728	0.0520955	0.001205	0.977432
FBgn0034225	veil	3.51517	8.91571e-10	2.49672	0.0101234	0.00880583	0.766524
FBgn0010812	unc-45	3.49722	0.00216688	2.28044	0.00110974	0.00255155	0.0652245
FBgn0032253	CG5322	3.4363	0.030113	2.30192	0.0725634	0.00122389	0.324465
FBgn0011703	RnrL	3.41688	1.84029e-05	2.06738	0.0435138	7.57491e-05	0.547185
FBgn0029167	Hml	3.40089	0.0011172	1.97536	0.0467159	0.000304091	0.25403
FBgn0010470	Fkbp13	3.38342	0	2.0586	1.72988e-09	0.00498355	0.706935
FBgn0028411	Nxt1	3.36639	0.00276946	1.50974	0.127958	0.00200347	0.970994
FBgn0268063	ltl	3.33919	2.39497e-05	2.77577	0.141132	0.000574468	0.0758947
FBgn0262656	dm	3.31519	0.00731281	1.81288	0.436103	0.00933121	0.916325
FBgn0011828	Pxn	3.26557	0.000180976	1.77944	0.000491566	3.80612e-06	0.814842
FBgn0033454	CG1671	3.25959	0.0107874	1.5519	0.293948	0.00711448	0.954683
FBgn0085354	CG34325	3.2436	6.39667e-05	1.32643	0.0339382	0.000120188	0.991463
FBgn0033540	Elp2	3.24221	0.00604672	1.38995	0.544491	0.00230087	0.993175
FBgn0051793	CG31793	3.24066	0.0393606	2.25841	0.169465	0.0366537	0.662881
FBgn0037186	CG11241	3.22633	0.00219368	1.65198	0.0118622	0.0056298	0.949051
FBgn0022029	l(2)k01209	3.22631	0.000703422	1.69742	0.106268	0.0175502	0.858403
FBgn0039644	CG11897	3.22467	0.00866327	1.9468	0.182832	0.00682882	0.632804
FBgn0034819	CG9877	3.22387	0.000833929	2.21339	7.3064e-10	2.99399e-05	0.588686
FBgn0266084	Fhos	3.22007	0.00201393	1.59302	0.27166	1.52895e-05	0.930745
FBgn0032166	CG4619	3.20539	0.0106435	1.53356	0.503267	0.0307646	0.976027
FBgn0033548	CG7637	3.18872	0.00646721	1.31189	0.543554	0.010659	0.995503
FBgn0052707	APC4	3.18389	0.0244613	1.40061	0.479022	0.0146975	0.995237
FBgn0021995	Rs1	3.1764	0.00651149	1.60397	0.169655	0.0124512	0.911253
FBgn0261383	IntS6	3.17244	0.0265474	2.4361	0.191604	0.00101638	0.242953
FBgn0026562	BM-40-SPARC	3.16964	0.00818706	1.54708	6.76661e-11	0.00727528	0.954111
FBgn0085334	CG34305	3.14831	0	1.09757	0.709575	0.0180228	0.958472
FBgn0036462	mRpL39	3.14286	7.32089e-05	1.32054	0.376156	0.0120849	0.997667
FBgn0027903	CG12018	3.13458	0.0168808	1.39907	0.438672	0.0283126	0.993175
FBgn0032783	CG10237	3.0815	0.0210946	1.40061	0.0501158	0.0215704	0.993639
FBgn0026079	Nsun2	3.08119	0.00619027	1.70481	0.209023	0.00585087	0.879273
FBgn0000299	Cg25C	3.07253	0.00196941	1.96217	2.49545e-06	0.0032266	0.411299
FBgn0010660	Nup214	3.04094	0.0192151	1.68679	0.287239	0.00891505	0.879273
FBgn0010497	dmGlut	3.03701	0.00110653	1.78859	5.03707e-05	0.00836693	0.548813
FBgn0014033	Sr-CI	3.03432	1.44353e-05	1.94759	0.0789788	0.00106737	0.726501
FBgn0000043	Act42A	3.03331	1.09484e-11	2.18855	5.12178e-06	0.000143787	0.375202
FBgn0029174	FKBP59	3.00019	3.68358e-06	1.56042	0.01659	0.00042808	0.914073

## Sheet: Sheet2
Transcriptional regulation targets in GluRIIA identified using reduced cut off of 1.5 fold
Gene Symbol	transcriptional profiling RPKM GluRIIA vs wild type fold change	transcriptional profiling GluRIIA vs wild type p-value (Baggerley's test)	Wild Type transcriptional profiling replicate 1 expression value (RPKM)	Wild Type transcriptional profiling replicate 2 expression value (RPKM)	Wild Type transcriptional profiling replicate 3 expression value (RPKM)	GluRIIA transcriptional profiling replicate 1 expression value (RPKM)	GluRIIA transcriptional profiling replicate 2 expression value (RPKM)	GluRIIA transcriptional profiling replicate 3 expression value (RPKM)	Genome sequence location
obst-A	2.80672	0.0116568	76.3631	37.8701	29.3103	168.001	131.878	103.008	X:20,239,855..20,243,209
amd	2.43132	0.025875	4.62571	1.21678	2.72968	5.98273	8.82533	6.03363	2L:19,110,154..19,114,110
CG7299	2.26986	0.0235361	1070.98	325.809	760	931.636	1974.43	1989.54	2L:10,683,427..10,684,409
CG3714	2.19991	0.00720796	4.81107	5.42156	5.66064	8.70205	13.6803	12.5813	2L:4,189,340..4,198,071
obst-E	1.60437	0.00710238	568.952	702.318	657.964	822.162	1349.18	923.869	2L:5,762,553..5,766,142
Taf10b	-1.55155	0.00534552	36.6092	47.3472	59.9436	27.1774	31.1398	34.4288	2L:2,767,286..2,767,845
lectin-28C	-1.92499	0.000384575	28.9514	39.8522	41.2629	16.7189	13.8375	26.6212	2L:7,857,077..7,860,120
CG7224	-2.0663	0.00455111	911.631	857.369	954.655	617.291	182.29	518.551	2L:7,998,869..7,999,676
CG10399	-2.33078	0.00474613	10.0719	13.0443	14.3774	5.19345	7.0195	3.87335	2L:6,960,377..6,961,653
CG15784	-3.29975	0.0113944	319.572	300.607	160.51	121.808	49.2033	65.5796	X:5,429,571..5,432,526
CG13397	-6.14964	0.000236489	8.48157	7.065	5.72792	1.43918	1.15585	0.86444	2L:8,408,888..8,411,868
Translational up-regulation targets in GluRIIA identified using reduced cut off of 1.5 fold
Gene Symbol	translation efficiency GluRIIA vs wild type fold change	translation efficiency GluRIIA vs wild type p-value (Student's t test)	Wild Type replicate 1 translaion efficiency	Wild Type replicate 2 translaion efficiency	Wild Type replicate 3 translaion efficiency	GluRIIA replicate 1 translaion efficiency	GluRIIA replicate 2 translaion efficiency	GluRIIA replicate 3 translaion efficiency	Genome sequence location
CG1840	1.72635	0.012343	0.442615	0.413129	0.379618	0.814338	0.58643	0.731894	X:11,888,352..11,889,186
